# Supplementary material for: Drawing Lines: How the Public Defines 'Serious' Genetic Conditions for Reproductive Testing
Source: Research Square preprint supplement (doi:10.21203/rs.3.rs-8793263/v1), 2026-02-23
Supplement: Supplementary file 1 [file 2da5da422c5ab6b6e6268a9b.docx]

**Supplementary 3. Barriers to PGT-M Use (N=458)**

| **Barrier** | **n** | **%** |
| --- | --- | --- |
| Economic burden | 322 | 70.3 |
| Concern about differing values with partner | 222 | 48.5 |
| Guilt about selecting children | 174 | 38.0 |
| Social/family pressure not to use PGT-M | 86 | 18.8 |
| Concern about violating child's right not to know genetic information | 82 | 17.9 |
| Social/family pressure to use PGT-M | 40 | 8.7 |
| Other | 11 | 2.4 |
| No particular barriers | 13 | 2.8 |
