# Supplementary material for: Drawing Lines: How the Public Defines 'Serious' Genetic Conditions for Reproductive Testing
Source: Research Square preprint supplement (doi:10.21203/rs.3.rs-8793263/v1), 2026-02-23
Supplement: Supplementary file 3 [file c83e4fc2ca5d35321e1b4f80.docx]

**Supplementary 2. PGT-M Awareness and Willingness to Use (N=458)**

| **Variable** | **n** | **%** |
| --- | --- | --- |
| **Would you like to undergo PGT-M if it were available to you?** | | |
| Very much | 34 | 7.4 |
| Somewhat | 169 | 36.9 |
| Neutral | 129 | 28.2 |
| Not much | 104 | 22.7 |
| Not at all | 28 | 6.1 |
| **PGT-M Would Encourage Marriage/Pregnancy Decisions** | | |
| Strongly agree | 70 | 15.3 |
| Somewhat agree | 173 | 37.8 |
| Neutral | 147 | 32.1 |
| Somewhat disagree | 61 | 13.3 |
| Strongly disagree | 5 | 1.1 |
